# Supplementary material for: Synthesis of hollow Cu1.8S nano-cubes for electromagnetic interference shielding
Source: Royal Society of Chemistry journal article supplement (doi:10.1039/c7nr02819a), 2017-01-01
Supplement: c7nr02819a1.pdf [file c7nr02819a1.pdf]

## **Electronic Supplementary Information (ESI)**

### **Synthesis of hollow Cu<sub>1.8</sub>S nano-cubes for electromagnetic interference shielding**

Wanchun Jiang,<sup>a</sup> Fan Wu,<sup>ab\*</sup> Yijun Jiang,<sup>a</sup> Mengxiao Sun,<sup>ab</sup> Kun Zhang,<sup>ac</sup>  
Yilu Xia,<sup>c</sup> Derong Wang,<sup>a</sup> Aming Xie<sup>b\*</sup>

- a. State Key Laboratory for Disaster Prevention & Mitigation of Explosion & Impact, PLA University of Science and Technology, Nanjing 210007, P. R. China.
- b. School of Mechanical Engineering, Nanjing University of Science & Technology, Nanjing 210094, P. R. China.
- c. School of Chemical Engineering, Nanjing University of Science & Technology, Nanjing 210094, P. R. China.

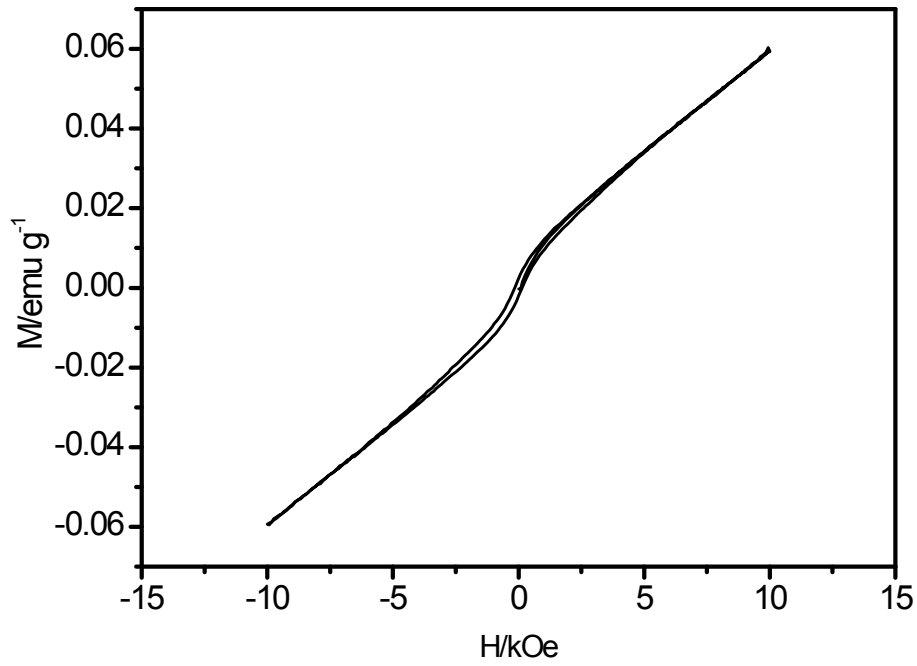

**Fig. S1** The magnetic hysteresis loops of hollow  $\text{Cu}_{1.8}\text{S}$  nano-cubes.

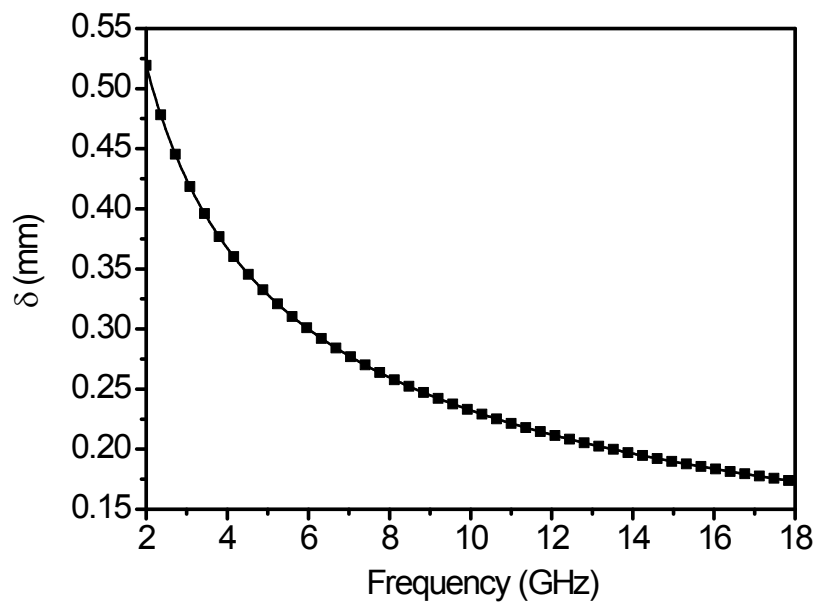

**Fig. S2**  $\delta$  of an ideal film with 100 wt% of hollow  $\text{Cu}_{1.8}\text{S}$  nano-cubes.

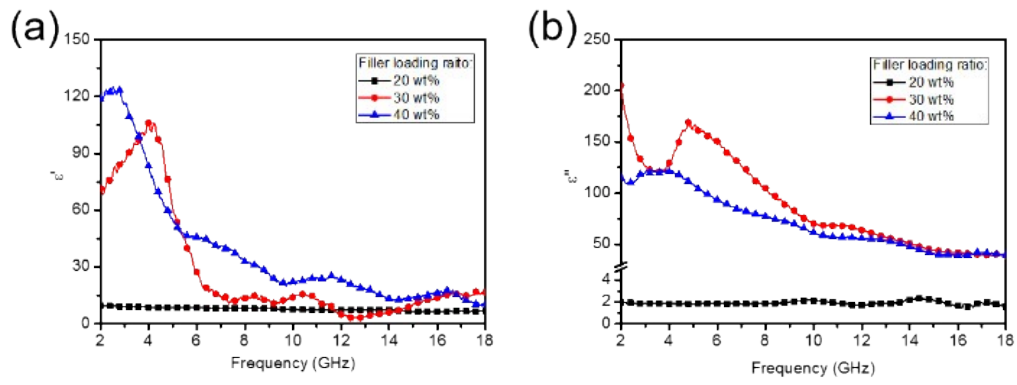

**Fig. S3** The real part (a) and imaginary part (b) of  $\epsilon_r$ , the filler loading ratios of hollow  $\text{Cu}_{1.8}\text{S}$  nano-cubes in wax are 20, 30 and 40 wt%.

**Table S1.** EMI SE of Typical Materials Reported in Recent Literatures. (PMMA: polymethylmethacrylate; WPU: water-borne polyurethane; PEI: polyetherimide; PVDF: poly(vinylidene fluoride); PLLA: poly (*L*-lactic acid); PR: Phenolic resin)

| Fillers                                           | Matrix             | Loading ratio | Test frequency range<br>(GHz) | Best EMI SE<br>(dB) | Thickness<br>(mm) | Ref. |
|---------------------------------------------------|--------------------|---------------|-------------------------------|---------------------|-------------------|------|
| Porous carbon                                     | Wax                | 20 wt. %      | 2-18                          | 50                  | 2.0               | 1    |
| RGO                                               | PMMA               | 1.8 vol. %    | 8-12                          | <20                 | 4.0               | 2    |
| RGO                                               | PMMA               | 4.2 vol. %    | 8-12                          | 30                  | 3.4               | 3    |
| RGO                                               | WPU                | 7.7 wt. %     | 8.2-12.4                      | 32                  | 2.0               | 4    |
| RGO                                               | PEI                | 10 wt. %      | 8-12                          | <25                 | 2.3               | 5    |
| RGO@Fe <sub>3</sub> O <sub>4</sub>                | PEI                | 10 wt. %      | 8-12                          | <20                 | 2.5               | 6    |
| CNTs sponge                                       | Epoxy              | 2 wt. %       | 8-12                          | 40                  | 2.0               | 7    |
| RGO                                               | BaTiO <sub>3</sub> | 4 wt. %       | 8.2-12.4                      | 40                  | 1.5               | 8    |
| CNTs                                              | WPU                | 76 wt. %      | 8.2-12.4                      | 80                  | 0.8               | 9    |
| RGO-foam                                          | -                  | 100 wt. %     | 8-12                          | 25.2                | 0.3               | 10   |
| CNTs                                              | PLLA               | 10 wt. %      | 8.2-12.4                      | 23                  | 2.5               | 11   |
| RGO                                               | PU sponge          | 10 wt. %      | 8-12                          | 57.7                | 60                | 12   |
| carbon fibers/RGO@ Fe <sub>2</sub> O <sub>3</sub> | PR                 | 30 wt. %      | 8.2-12.4                      | 45.26               | 4.0               | 13   |

## REFERENCES

- [S1] Song, W.; Cao, M.; Fan, L.; Lu, M.; Li, Y.; Wang, C. and Ju, H. Highly Ordered Porous Carbon/Wax Composites for Effective Electromagnetic Attenuation and Shielding. *Carbon* **2014**, *77*, 130-142
- [S2] Zhang, H.; Yan, Q.; Zheng, W.; He, Z. and Yu, Z. Tough Graphene-Polymer Microcellular Foams for Electromagnetic Interference Shielding. *ACS Appl. Mater. Interfaces* **2011**, *3*, 918-924.
- [S3] Zhang, H.; Zheng, W.; Yan, Q.; Jiang, Z. and Yu, Z. The Effect of Surface Chemistry of Graphene on Rheological and Electrical Properties of Polymethylmethacrylate Composites. *Carbon* **2012**, *50*, 5117-5125.
- [S4] Hsiao, S.; Ma, C. M.; Tien, H.; Liao, W.; Wang, Y.; Li, S. and Huang, Y. Using a Non-Covalent Modification to Prepare a High Electromagnetic Interference Shielding Performance Graphene Nanosheet/Water-Borne Polyurethane Composite. *Carbon* **2013**, *60*, 57-66.
- [S5] Ling, J.; Zhai, W.; Feng, W.; Shen, B.; Zhang, J. and Zheng, W. Facile Preparation of Lightweight Microcellular Polyetherimide/Graphene Composite Foams for Electromagnetic Interference Shielding. *ACS Appl. Mater. Interfaces* **2013**, *5*, 2677-2684.
- [S6] Shen, B.; Zhai, W.; Tao, M.; Ling, J. and Zheng, W. Lightweight, Multifunctional Polyetherimide/Graphene@Fe<sub>3</sub>O<sub>4</sub> Composite Foams for Shielding of Electromagnetic Pollution. *ACS Appl. Mater. Interfaces* **2013**, *5*, 11383-11391.
- [S7] Chen, Y.; Zhang, H.; Yang, Y.; Wang, M.; Cao, A. and Yu, Z. High-Performance Epoxy Nanocomposites Reinforced with Three-Dimensional Carbon Nanotube Sponge for Electromagnetic Interference Shielding. *Adv. Mater.* **2016**, *26*, 447-455.
- [S8] Qing, Y.; Wen, Q.; Luo, F.; Zhou, W. and Zhu, D. Graphene Nanosheets/BaTiO<sub>3</sub> Ceramics as Highly Efficient Electromagnetic Interference Shielding Materials in the X-Band. *J. Mater. Chem. C* **2016**, *4*, 371-375.
- [S9] Zeng, Z.; Chen, M.; Jin, H.; Li, W.; Xue, X.; Zhou, L.; Pei, Y.; Zhang, H. and Zhang, Z. Thin and Flexible Multi-Walled Carbon Nanotube/Waterborne Polyurethane Composites with High-Performance Electromagnetic Interference Shielding. *Carbon* **2016**, *96*, 768-777.
- [S10] Shen, B.; Li, Y.; Yi, D.; Zhai, W.; Wei, X. and Zheng, W. Microcellular Graphene Foam for Improved Broadband Electromagnetic Interference Shielding. *Carbon* **2016** *102*, 154-160.
- [S11] Kuang, T.; Chang, L.; Chen, F.; Sheng, Y.; Fu, D. and Peng, X. Facile Preparation of Lightweight High-Strength Biodegradable Polymer/Multi-Walled Carbon Nanotubes Nanocomposite Foams for Electromagnetic Interference Shielding. *Carbon* **2016**, *105*, 305-313.
- [S12] Shen, B.; Li, Y.; Zhai, W. and Zheng, W. Compressible Graphene-Coated Polymer Foams with Ultralow Density for Adjustable Electromagnetic Interference (EMI) Shielding. *ACS Appl. Mater. Interfaces* **2016**, *8*, 8050-8057.
- [S13] Singh, A.; Garg, P.; Alam, F.; Singh, K.; Mathur, R.; Tandon, R.; Chandra, A

and Dhawan, S. Phenolic resin-based composite sheets filled with mixtures of reduced graphene oxide,  $\gamma$ -Fe<sub>2</sub>O<sub>3</sub> and carbon fibers for excellent electromagnetic interference shielding in the X-band. *Carbon* **2012**, *50*, 3868-3875.
